# Rewards interact with explicit knowledge to enhance skilled motor performance

Sean P. Anderson<sup>a</sup>, Tyler J. Adkins<sup>a</sup>, Bradley S. Gary<sup>a</sup>, Taraz G. Lee<sup>a</sup>

<sup>a</sup> Department of Psychology, University of Michigan  
530 Church St., Ann Arbor, MI, 48109

Corresponding Author: Taraz G. Lee, [tarazlee@umich.edu](mailto:tarazlee@umich.edu)

# **Abstract**

From typing on a keyboard to playing the piano, many everyday skills require the ability to quickly and accurately perform sequential movements. It is well-known that the availability of rewards lead to increases in motivational vigor whereby people enhance both the speed and force of their movements. However, in the context of motor skills, it is unclear whether rewards also lead to more effective motor planning and action selection. Here, we trained human participants to perform four separate sequences in a skilled motor sequencing task. Two of these sequences were trained explicitly and performed with pre-cues that allow for the preplanning of movements, while the other two were trained implicitly. Immediately following the introduction of performance-contingent monetary incentives, participants improved their performance on all sequences consistent with enhancements in motivational vigor. However, there was a much larger performance boost for explicitly trained sequences. Furthermore, only on explicit sequences was the size of this incentive-based enhancement correlated with the amount of skill knowledge gained. We replicated these results in a second, pre-registered experiment with an independent sample. We conclude from these experiments that rewards enhance both the pre-planning of movements as well as motivational vigor.

# **Keywords**

Reward, sequence learning, motor learning, implicit, explicit, motor skills

# 1. Introduction

Rewards and incentives drive people to work more vigorously and to expend more energy to accomplish their goals. This increase in *motivational vigor* has been shown to improve performance of simple motor movements (e.g., reaches, saccades, etc.) by shifting the speed-accuracy trade-off function, resulting in movements that are both faster and more accurate (Manohar et al., 2015; Summerside, Shadmehr, & Ahmed, 2018; Takikawa, Kawagoe, Itoh, Nakahara, & Hikosaka, 2002). Motor skills, and specifically motor sequencing skills, involve the precise execution of a chain of simple motor movements at specific times. However, they also require recognition of the current context and the rapid selection of the correct action given that context. As a sequencing skill develops, these processes can be pre-planned, allowing for improved performance (Ariani & Diedrichsen, 2019; Diedrichsen & Kornysheva, 2015). While reward availability and increased motivation also improve performance of more complex motor skills (Mosberger, De Clauser, Kasper, & Schwab, 2016; Wachter, Lungu, Liu, Willingham, & Ashe, 2009), it remains unclear which stages of the motor planning hierarchy from stimulus to movement (action selection, action execution, etc.) are sensitive to these motivational effects.

Motor sequence learning tasks such as the serial reaction time task (SRTT) and the discrete sequence production (DSP) task are widely used as a model of motor skill acquisition (see Krakauer, Hadjiosif, Xu, Wong, & Haith, 2019 for a comprehensive review). Although skill acquisition in sequence learning tasks is often thought to be largely implicit (Nissen & Bullemer, 1987; Reber & Squire, 1994), these skills can be taught at least partially via explicit instruction (Grafton, Hazeltine, & Ivry, 1995; D. B. Willingham & Goedert-Eschmann, 1999). For example, providing the sequence or alerting the learner that a to-be-learned sequence is present can result in faster acquisition, fewer errors produced, and more rapid execution (Lee, Acuña, Kording, & Grafton, 2019; Schendan, Searl, Melrose, & Stern, 2003; Daniel B Willingham, Salidis, & Gabrieli, 2002). Traditionally, it has been thought that explicit knowledge of sequence order enables advanced motor planning of the known sequence elements, essentially enhancing the action selection process (Diedrichsen & Kornysheva, 2015; Hikosaka, Nakamura, Sakai, & Nakahara, 2002). Explicit training is also associated with cognitive control, a collection of cognitive processes that promote goal-directed behavior. For example, working memory capacity relates to the rate of explicit skill learning (Anguera, Reuter-Lorenz, Willingham, & Seidler, 2010) and explicit training coincides with increases in activity in brain regions such as the dorsolateral prefrontal cortex that are important for working memory and other cognitive control processes (Grafton et al., 1995; Schendan et al., 2003; Daniel B Willingham et al., 2002). Performance-contingent rewards have been shown to enhance cognitive control processes. In particular, rewards have been associated with improvements in proactive control, which is the advanced maintenance of goal information (Botvinick & Braver, 2014; Etzel, Cole, Zacks, Kay, & Braver, 2015; Jimura, Locke, & Braver, 2010; Padmala & Pessoa, 2011). Thus, it is possible that reward-based enhancement of motor skills could be due in part to these enhancements in cognitive control and prospective planning in addition to improvements in simple motor execution.

However, some recent evidence suggests that explicit sequence knowledge does not affect motor planning, but instead results in an overall increase in motivation (Wong et al., 2015). This increase in motivation in turn globally enhances movement vigor. In this study, participants were faster at executing known sequences than random sequences, but they showed similar performance improvements in executing movements for random elements embedded within these known sequences. Because this improvement could not be due to benefits in movement planning, the authors concluded that explicit knowledge simply enhances the motivational vigor of all movements. This result leads to the hypothesis that any enhancement of skilled performance by explicit knowledge is due to improvements in simple motor execution and not improvements in motor planning per se.

Here, we sought to determine whether motivational enhancements of skilled performance result from an improvement in simple motor execution, an improvement in motor planning/action selection, or both. Across two experiments, participants were trained on four separate motor sequences in a discrete sequence production (DSP) task. Two of the sequences were implicitly trained, while the other two were trained with explicit instructions and pre-movement cues that could allow participants to pre-plan their movements. Immediately following training, participants performed these learned skills for cash rewards to assess how increased motivation impacts skilled motor performance. We hypothesized that if monetary incentives improve skilled performance by simple increases in motivational vigor for all movements, we would observe similar levels of improvement for both implicitly and explicitly trained skills. If explicit knowledge itself acts as a reward cue which increases motivational vigor and does not aid motor planning as argued by Wong et al. (2015), one might expect that the introduction of monetary incentives would confer greater benefits to implicitly trained skills. Furthermore, if there is a point at which improvements in motivational vigor saturate, and explicit knowledge and reward improve performance through similar mechanisms (i.e. enhanced motivational vigor), one might expect to observe little to no improvement with the introduction of rewards for explicitly trained skills. In contrast, we expected that if explicit training leads to increases in skill knowledge that facilitates motor planning, monetary incentives would lead to larger improvements in explicit skills than implicit skills. To validate our results following Experiment 1, we pre-registered our hypotheses and analyses and performed a direct replication of this initial experiment in a separate sample of individuals (Experiment 2).

## 2. EXPERIMENT 1

### 2.1. Experiment 1 Materials and Methods

#### 2.1.1. Participants

61 Participants participated in Experiment 1 (48 Females, 12 Males, 1 unreported, all right-hand dominant, mean age = 20.8). 4 Participants were excluded from the entire experiment because they used both hands. Data was used from 56 participants in total. However, one subject was excluded from Generation and Recognition analyses (see

Explicit Knowledge Tests below) because they left the experiment before the tests could be completed leaving 55 participants in those analyses. All participants were paid \$10/hr + performance bonuses for their participation and provided written informed consent.

### 2.1.2. Discrete Sequence Production Task

The task consisted of a modification of the Discrete Sequence Production task (Verwey, Lammens, & van Honk, 2002). Participants sat centered in front of a computer screen with a standard QWERTY keyboard and were instructed to use their non-dominant left hand at all times. During a single trial, a colored square (see below) was displayed in the center of the screen for 1 s to notify participants of the identity of the upcoming sequence. Afterwards, four grey and square placeholders were displayed corresponding to four adjacent keys (A, S, D, F) for another 1 s. One of the placeholder boxes turned white until the corresponding key was pressed, after which it would be extinguished and another placeholder box would turn white. This continued for a total of 8 items per trial, making up a sequence. Participants were instructed to type these sequences as quickly and as accurately as possible. If an incorrect key was pressed, the corresponding placeholder box would turn red for one second and the experiment advanced to the next trial. There was also a time deadline for each trial: set to 3 s during Training and calibrated to the individual during the Reward phase (see below). If the participant did not successfully type the entire 8-item sequence before the time deadline a message saying “Too Slow” was displayed for one second and the trial was aborted.

### 2.1.3. Training phase

Each participant was exposed to four separate 8-item sequences picked from a corpus of possible sequences. Each sequence did not include trills (e.g. 1-2-1-2) nor runs (e.g. 1-2-3-4) and began with a different key. Two of these sequences were presented with a unique color cue appearing at the start of the trial to facilitate explicit training. Participants were told that they were to learn to associate the color cues with the sequences and that this would aid in training. A gray cue appeared before each of the remaining two sequences. Participants were told that the gray cue signified that the upcoming trial would be randomly generated. These sequences act as a control to allow us to compare to the cued sequences to measure general skill improvement. To ensure that these sequences were learned implicitly, on a subset of trials participants were exposed to a gray cue followed by a pseudo-randomly generated sequence to prevent participants from noticing the repeating patterns (see Figure 1a).

Participants completed a total of 400 trials during training. Within the two Explicit conditions, one sequence was trained extensively (Deep), appearing in 120 trials during the Training phase. The other Explicit sequence appeared in only 40 trials during Training (Shallow). Similarly, one of the Implicit sequences appeared on 120 trials (Deep) and the other just 40 trials (Shallow). The pseudo-randomly generated sequences appeared on 80 trials (20% of the total number of trials). All together there

were five conditions: Explicit/Deep (E/D), Explicit/Shallow (E/S), Implicit/Deep (I/D), Implicit/Shallow (I/S), and Untrained. The actual sequences used for each of these conditions was counterbalanced across participants such that no observed effects between conditions could be due to the precise sequences performed. Each participant completed 8 blocks of 50 trials each during training. The order of each sequence presentation was randomized within each block. Prior to training, participants were told that there would be a “test” phase following training to assess how much they had learned.

#### 2.1.4. Reward phase

After the Training phase, participants were informed that they would now complete the task for the chance to win cash bonuses. During the cue presentation (2 seconds) at the outset of each trial, an incentive value for the trial was displayed: \$5, \$10, or \$20 (Figure 1b). Participants were instructed that at the end of the experiment, a trial would be selected at random, and if they successfully completed that trial (pressing all 8 items within the time limit) they would receive the associated reward for that trial. This encouraged participants to evaluate each incentive value independently of the other trials. Participants were also instructed that to ensure that they didn’t slow down to try to earn rewards, we would impose a stricter time limit during the Reward phase.

Participants completed 9 blocks of 27 trials each. Each sequence (E/D, E/S, I/D, I/S) was tested in 48 trials each, 16 for each incentive value. Random sequences appeared in 51 trials. To protect against carryover effects, incentive values were presented in an m-sequence (Buračas & Boynton, 2002).

In order to equalize trial difficulty across participants and sequence conditions, time limits for each sequence were calibrated individually based on participants’ performance at the end of the Training phase. For each participant, the time limit for each sequence was calculated by taking the 75<sup>th</sup> percentile of their movement times during their last eight accurate trials in Training for that sequence. Each subject had a different time limit for each of the sequence conditions. This enabled us to use accuracy as a dependent measure and compare it across participants and conditions. Additionally, this reduced the possibility of floor and ceiling effects, and minimized speed/accuracy trade-offs during performance. That is, the time limits prevented participants from purposely slowing their execution time in order to be more accurate to increase their chances of success.

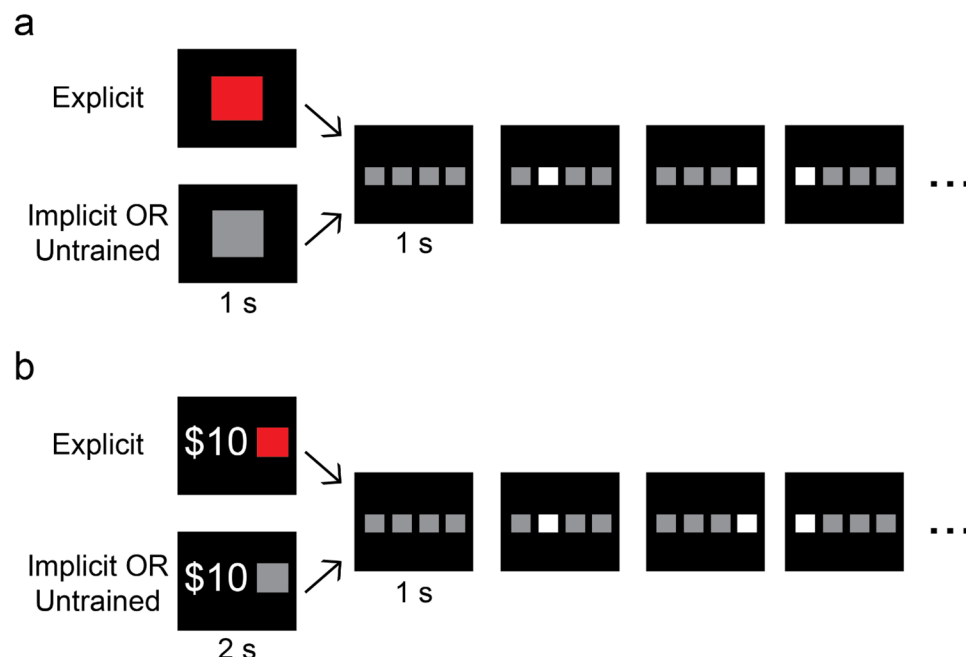

**Figure 1.** Discrete Sequence Production Task. a) Participants trained to perform four different 8-item sequences (two explicit, two implicit) with their non-dominant hand. Prior to execution of explicitly trained sequences, a colored square was presented to cue the participants of the identity of the upcoming sequence to facilitate awareness and to allow for movement pre-planning. For both implicitly trained sequences, a gray square was presented. Participants were told that sequences following a gray cue would be randomly generated. b) Immediately following training, participants performed the same task for cash bonuses. The reward value (\$5, \$10, or \$20) for each trial appeared simultaneously with the sequence cue during this phase of the experiment.

### 2.1.5. Explicit Knowledge tests

After the Reward phase, participants completed two tests to assess their explicit knowledge of the sequences. In a free recall sequence generation test, participants were informed that not all grey-cued sequences were random, and there were in fact two sequences and a random condition during grey cued trials. Participants were then asked to type out each sequence from memory. For the explicitly cued sequences, participants attempted to type the sequence after the matching color cue was displayed. Since all sequences began with a unique key, participants were given the first item of the sequence for the implicitly trained sequences and asked to type the rest. Performance in the generation test was assessed by computing the Damerau-Levenshtein edit-distance (Damerau, 1964; Levenshtein, 1966) between the typed sequence and the correct sequence. This value is the number of insertions, deletions, transpositions, or substitutions needed to transform one sequence into the other.



Because participants were given the first key for each of the implicit sequences, this measure likely slightly over-estimates sequence knowledge for these sequences.

Immediately following the free recall test, participants completed a recognition test. Participants were prompted to complete a total of 16 separate sequences and asked to rate on a 7-point Likert scale how likely the sequences were to be new or old. 4 of the sequences were the trained ones from the experiment and 12 were randomly generated. Explicit knowledge was assessed by calculating the difference between the mean rating for random sequences to that for each trained sequence. Larger numbers indicate a greater ability to distinguish untrained and trained sequences.

### 2.1.6. Data Analysis

During each trial, response times for each item in the sequence were recorded. Movement Time (MT) was calculated as the duration between the first and last button presses. The trial was considered correct if all 8 items were pressed correctly before the time limit. Accuracy was defined as the proportion of correct trials within the condition(s) in question. Response Time (RT) was calculated as the duration between the presentation of the first item (when the placeholder box turned white) and the first button press. All analyses involving MT and RT were performed on accurate trials only. Additionally, to assess the immediate effect of introducing incentives, we computed the percentage change in MT and RT between the last trials of the Training phase and the first trials of the Reward phase. Specifically, for each subject and each sequence condition, we took the difference of the average performance on the last 10 accurate trials of Training (T-Last10) and the average performance on the first 10 accurate trials of Reward (R-First10). Percentage improvement was calculated as follows:

$$\frac{-(R-First10 - T-Last10) * (100\%)}{T-Last10}$$

To examine the effect of explicit cues and training depth on sequence learning during training, we entered training block number, cue type (explicit vs. implicit) and training depth (Deep vs. Shallow) as within-subject factors in separate repeated-measures ANOVAs for each dependent variable of interest (RT on correct trials, MT on correct trials, accuracy).

To examine the effect of explicit cues and training depth on Percentage improvement (between T-Last10 and R-First10), we entered cue type and training depth as within-subject factors in separate repeated-measures ANOVAs on percentage improvement in MT and in RT.

To examine the effect of explicit cues, training depth, and incentive value on performance during Reward, we entered cue type, training depth, and incentive value (\$5, \$10, or \$20) as within-subject factors in separate repeated-measures ANOVAs for each dependent variable of interest.



To examine the effect of explicit cues and training depth on knowledge of the sequences, we entered cue type and training depth as within-subject factors in separate repeated-measures ANOVAs on generation test performance and recognition test performance. In all ANOVAs, violations of sphericity were corrected using the Greenhouse-Geiser method.

## 2.2. Experiment 1 Results

### 2.2.1. *Explicit cues and increased practice led to better learning and performance in Training*

We first sought to verify the effectiveness of explicit cues in enhancing motor sequence learning. As expected, participants' motor skill improved throughout training, as they greatly reduced their total movement time (MT) for each sequence (Main effect of Block:  $F_{3.96, 209.71} = 163.390$ ,  $p < 0.001$ ,  $\eta_p^2 = 0.755$ ; Figure 2a) and also were better able to complete the 8-item sequences without execution errors (Main effect of Block on accuracy rate:  $F_{5.03, 276.73} = 2.32$ ,  $p = 0.043$ ,  $\eta_p^2 = 0.04$ ). MT was faster overall for explicitly cued sequences relative to implicitly cued sequences (main effect of explicit cues:  $F_{1.53} = 30.982$ ,  $p < 0.001$ ,  $\eta_p^2 = 0.369$ ). Explicit cues were also associated with a faster rate of improvement in MT as training progressed (cue x block interaction:  $F_{7.371} = 27.434$ ,  $p < 0.001$ ,  $\eta_p^2 = 0.341$ ). Similarly, explicit cues allowed for faster response times (RT) to the first item of each sequence ( $F_{1.55} = 67.806$ ,  $p < 0.001$ ,  $\eta_p^2 = 0.552$ ) and this advantage for explicitly cued sequences grew larger over the course of training (cue x block interaction:  $F_{2.927, 160.994} = 8.961$ ,  $p < 0.001$ ,  $\eta_p^2 = 0.140$ ). While there was not a main effect of explicit cueing on overall accuracy rate ( $F_{1.55} = 0.177$ ,  $p = 0.676$ ,  $\eta_p^2 = 0.003$ ), we did find a cue x block interaction ( $F_{7.385} = 2.935$ ,  $p = 0.005$ ,  $\eta_p^2 = 0.051$ ) driven by the fact that accuracy in explicit sequences improved at a slightly faster rate. These results point to tangible enhancements in learning and performance due to the explicit sequence cues rather than a simple shift along the speed-accuracy tradeoff curve (i.e. faster speed, but reduced accuracy on explicit sequences). Explicit cues during training conferred performance benefits to both learning and performance consistent with prior work.

We also sought to validate the effect of practice (depth of training) on performance. MT was faster for the deeply trained sequences (main effect of depth:  $F_{1.53} = 214.23$ ,  $p < 0.001$ ,  $\eta_p^2 = 0.802$ ) and the size of this advantage grew over the course of training (Block x Depth interaction:  $F_{4.802} = 9.570$ ,  $p < 0.001$ ,  $\eta_p^2 = 0.153$ ). Initial RT was also faster for deeply trained sequences relative to shallowly trained sequences ( $F_{1.55} = 6.609$ ,  $p = 0.013$ ,  $\eta_p^2 = 0.107$ ). Accuracy was also higher for deeply trained sequences ( $F_{1.55} = 66.941$ ,  $p < 0.001$ ,  $\eta_p^2 = 0.549$ ). Additionally, we observed a knowledge type by training depth interaction in MT ( $F_{1.53} = 21.846$ ,  $p < 0.001$ ,  $\eta_p^2 = 0.292$ ). The benefit of training depth on MT was more pronounced for explicitly cued sequences than for implicitly trained sequences. This interaction does not appear to be driven by a speed-accuracy tradeoff (faster MT, but reduced accuracy) as we did not observe a knowledge type by training depth interaction in accuracy ( $F_{1.55} = 0.065$ ,  $p = 0.800$ ,  $\eta_p^2 = 0.001$ ). In aggregate, and perhaps unsurprisingly, more practice on a sequence corresponded with better performance.

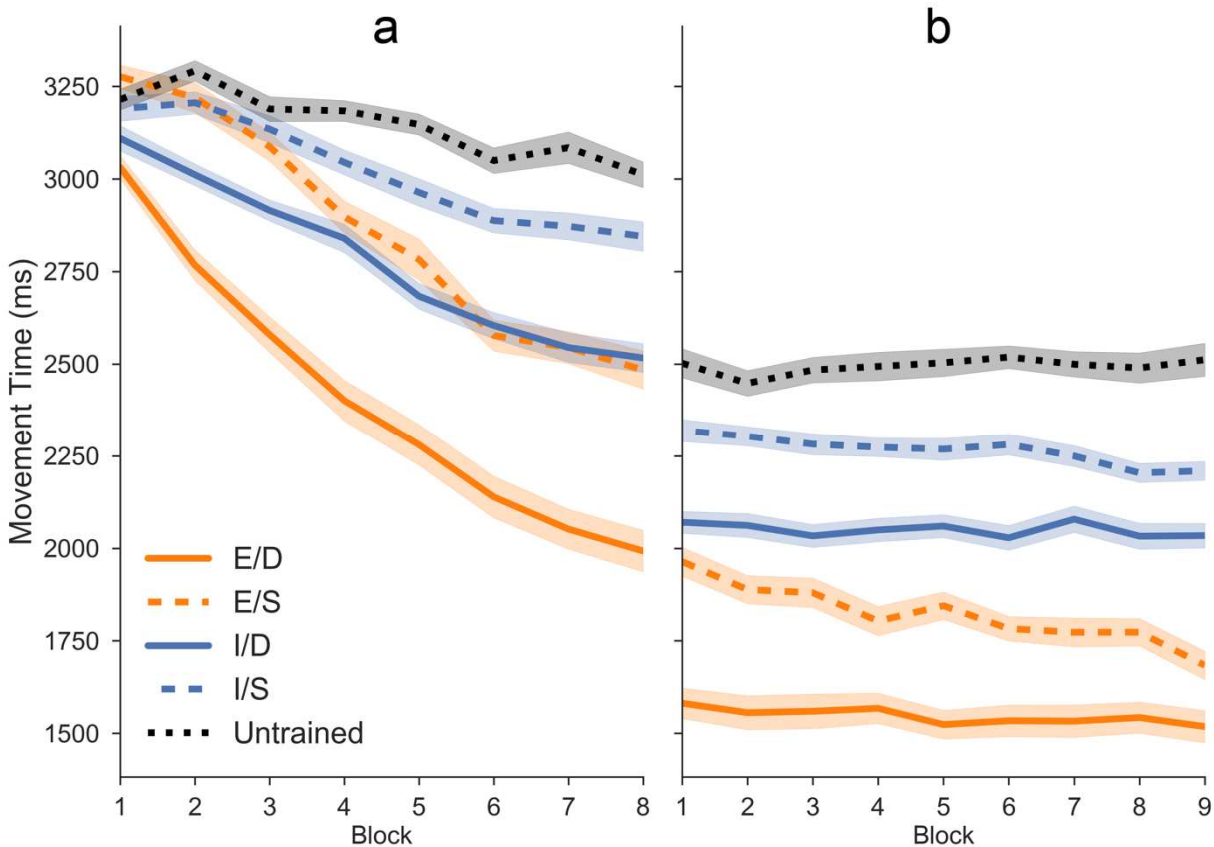

**Figure 2.** Mean movement time for correctly executed sequences. Skill was measured as the total movement time between the first and last item in each sequence. a) Explicit sequence cues and increased training were both associated with faster rates of learning. b) Following the introduction of performance-contingent monetary incentives, movement times immediately decreased for all sequences. Shaded areas indicate SEM<sup>norm</sup>. (E/D – Deeply trained, Explicit; I/D – Deeply trained, Implicit; E/S – Shallowly trained, Explicit; I/S – Shallowly trained, Implicit).

### 2.2.2. Monetary incentives lead to immediate enhancements in both simple motor vigor and cue-based planning

We were primarily interested in whether explicit knowledge moderates the effect of motivation on motor performance through improved motor planning. To this end, we examined the immediate effect of the introduction of performance-contingent monetary incentives following the Training phase of the experiment. Any change in performance between the two phases of the experiment is unlikely due to learning given the limited number of additional trials; rather, it should reflect immediate enhancements in motor vigor and/or motor planning due to increased motivation. In response to this increase in extrinsic motivation, participants were able to immediately enhance the speed of their

execution for all trained sequences and random sequences (see Figure 2b and Figure 3;  $p < 0.001$  in one-sample t-tests for all sequences). The fact that there was a large decrease in MT on random sequences (19% on average), suggests that monetary incentives had a global effect on motivational vigor independent from any sequence-specific skill knowledge. The size of this boost in performance was virtually identical for random sequences and the two implicitly trained sequences (no main effect of sequence identity, explicit sequences excluded:  $F_{1,720, 92.904} = 1.254$ ,  $p = 0.286$ ,  $\eta_p^2 = 0.023$ ). However, MT improvement for explicitly cued sequences was significantly greater than that for implicitly trained sequences (main effect of cue type:  $F_{1,55} = 33.485$ ,  $p < 0.001$ ,  $\eta_p^2 = 0.378$ ), suggesting that monetary incentives produced skill enhancements for explicitly trained sequences above and beyond simple increases in overall motor vigor.

These effects cannot simply be explained by the fact that participants are relatively faster at the end of training for the explicitly cued sequences. We did not find a statistically significant relationship between MT at the end of training and the size of the reward-related performance enhancement for any of the sequences following correction for multiple comparisons via the Holm-Bonferroni method (E/D:  $r_s = 0.13$ ,  $p = 0.33$ ; E/S:  $r_s = 0.22$ ,  $p = 0.10$ ; I/D:  $r_s = -0.15$ ,  $p = 0.26$ ; I/S:  $r_s = -0.27$ ,  $p = 0.04$ ; Untrained:  $r_s = -0.21$ ,  $p = 0.11$ ). While we did find evidence that more shallowly trained sequences showed a greater motivational boost overall (main effect of training depth:  $F_{1,55} = 8.287$ ,  $p = 0.006$ ,  $\eta_p^2 = 0.131$ ) there was no depth x cue type interaction ( $F_{1,55} = 0.979$ ,  $p = 0.327$ ,  $\eta_p^2 = 0.017$ ). Furthermore, participants performed similarly during the last block of training on the I/D sequence and the E/S sequence ( $t_{55} = -0.483$ ,  $p = 0.631$ ), yet the immediate reward-based performance improvement was larger for the explicitly trained sequence (E/S) ( $t_{55} = -6.185$ ,  $p < 0.001$ ). Because these sequences were matched in performance prior to the introduction of monetary incentives, this again demonstrates that increased motivation influences both advanced planning as well as simple motor vigor.

The introduction of monetary incentives also led to faster RT to the first item of each sequence ( $p < 0.001$  in one-sample t-tests for all sequences). However, this reduction in RT was similar across all sequences as we found no significant effects of cue type or training depth (main effect of cue type:  $F_{1,55} = 0.298$ ,  $p = 0.587$ ,  $\eta_p^2 = 0.005$ ; main effect of training depth:  $F_{1,55} = 0.093$ ,  $p = 0.761$ ,  $\eta_p^2 = .002$ ; depth x cue interaction:  $F_{1,55} = 3.459$ ,  $p = 0.068$ ,  $\eta_p^2 = 0.059$ ). This result again points to an increase in motivational vigor due to the introduction of monetary incentives. It also suggests that the greater improvement in MT for explicit sequences is in part due to benefits in planning movements beyond the first item in the sequence.

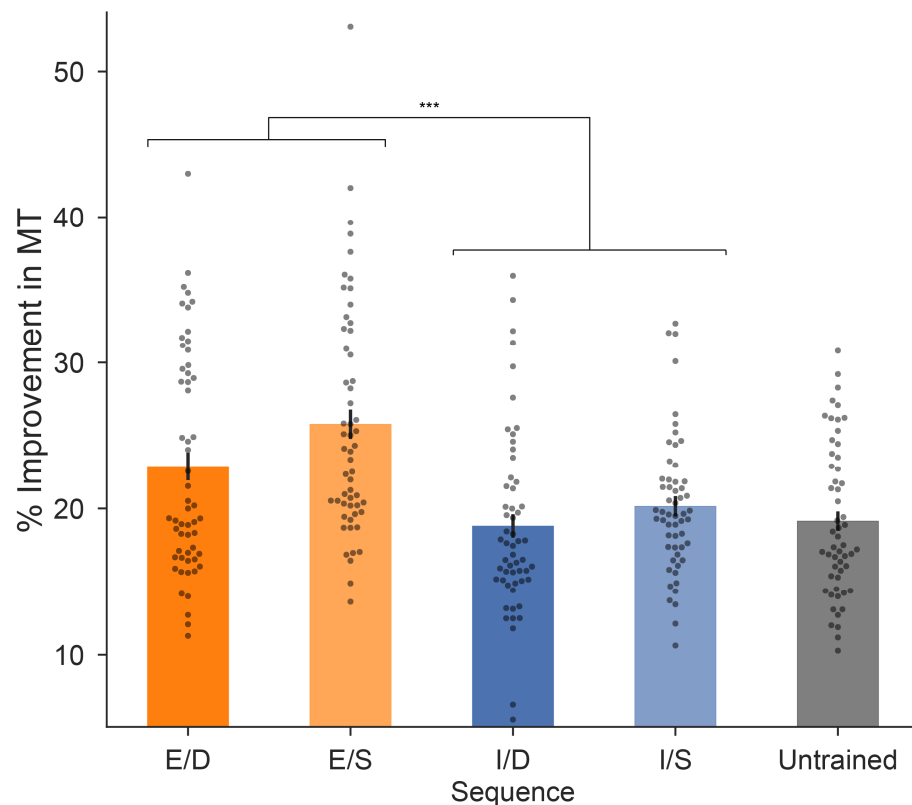

**Figure 3.** Incentive-based performance improvements. Immediately following the introduction of performance-contingent monetary incentives, participants improved their performance of all sequences. While the size of this performance improvement was similar for both implicit sequences and untrained sequences, explicitly trained skills improved to a much larger extent. Gray dots indicate individual subjects. Error bars indicate  $SEM^{norm}$ . (D/E – Deeply trained, Explicit; I/D – Deeply trained, Implicit, S/E – Shallowly trained, Explicit, I/S – Shallowly trained, Implicit; \*\*\* =  $p < 0.001$ ).

### 2.2.3. The benefit of explicit cues and training depth persist with performance-contingent incentives

To verify the performance benefits of explicit knowledge and increased practice remained in contexts with increased motivation, we examined overall performance in the Reward phase (Figure 2b). Explicit cues led to faster MT in Reward ( $F_{1,52} = 77.924$ ,  $p < 0.001$ ,  $\eta_p^2 = 0.600$ ). A similar main effect of explicit cues was observed in RT ( $F_{1,55} = 150.125$ ,  $p < 0.001$ ,  $\eta_p^2 = 0.732$ ). MTs were faster in deeply trained sequences during Reward (main effect of training depth:  $F_{1,52} = 103.403$ ,  $p < 0.001$ ,  $\eta_p^2 = 0.665$ ). The same effect was observed in RT ( $F_{1,55} = 15.997$ ,  $p < 0.001$ ,  $\eta_p^2 = 0.225$ ). The overall benefits of explicit cues and depth of training observed during Training remained with the addition of monetary incentives.

#### 2.2.4 Incentive magnitude weakly affects performance accuracy

We next assessed whether performance accuracy was sensitive to incentive magnitude in the Reward phase. Participants were not sensitive to incentive magnitude (main effect of incentive magnitude:  $F_{2,110} = 0.786$ ,  $p = 0.458$ ,  $\eta_p^2 = 0.014$ ). We did observe a relatively small, but significant interaction between reward and training depth on accuracy ( $F_{2,110} = 4.415$ ,  $p = 0.014$ ,  $\eta_p^2 = 0.074$ ). Shallow training accuracy exhibits an inverted-U shape, with relatively greater accuracy for \$10 trials (simple main effect of reward for Shallow:  $F_{2,110} = 3.45$ ,  $p = 0.035$ ; quadratic contrast:  $t = 2.58$ ,  $p = 0.01$ ). Incentive magnitude did not affect accuracy for Deeply trained sequences (simple main effect of reward for Deep:  $F_{2,110} = 1.61$ ,  $p = 0.21$ ).

We also examined whether training depth or explicit cues resulted in accuracy differences during the Reward phase. During the reward phase, shallowly trained sequences were more accurate overall (main effect of training depth:  $F_{1,55} = 11.495$ ,  $p = 0.001$ ,  $\eta_p^2 = 0.173$ ). Additionally, performance in implicit sequences may have been more accurate than in explicit sequences (marginal effect of cue type:  $F_{1,55} = 3.781$ ,  $p = 0.057$ ,  $\eta_p^2 = 0.064$ ). Given that the time limits were set based on performance at the end of training, these main effects are likely driven by the fact that time limits were somewhat stricter for the more well-learned and explicitly trained sequences.

#### 2.2.5. Greater explicit knowledge for explicitly cued sequences

A primary purpose of the explicit cues was to promote the formation of explicit knowledge of the cued sequences. To assess the effectiveness of this manipulation, we compared accuracy on the free-recall test across the different sequences. Participants were given either the sequence cue (explicit sequences) or the first item of the sequence (implicit sequences) and were asked to key in the entire sequence from memory. As expected, participants were able to recall and execute explicitly cued sequences more accurately than implicitly trained ones ( $F_{1,54} = 59.259$ ,  $p < 0.001$ ,  $\eta_p^2 = 0.523$ ; Figure 4). This is despite the fact that memory for implicit sequences was likely somewhat over-estimated since they were given the first item (see Materials and Methods). Additionally, there was an effect of training depth on explicit knowledge ( $F_{1,54} = 4.220$ ,  $p = 0.045$ ,  $\eta_p^2 = 0.072$ ), indicating that free-recall accuracy was better with increased practice. However, there was no interaction of training depth and explicit cues ( $F_{1,54} = 0.315$ ,  $p = 0.577$ ,  $\eta_p^2 = 0.006$ ). The explicit cueing manipulation successfully resulted in increased knowledge of explicit sequences, independent of the amount of practice.

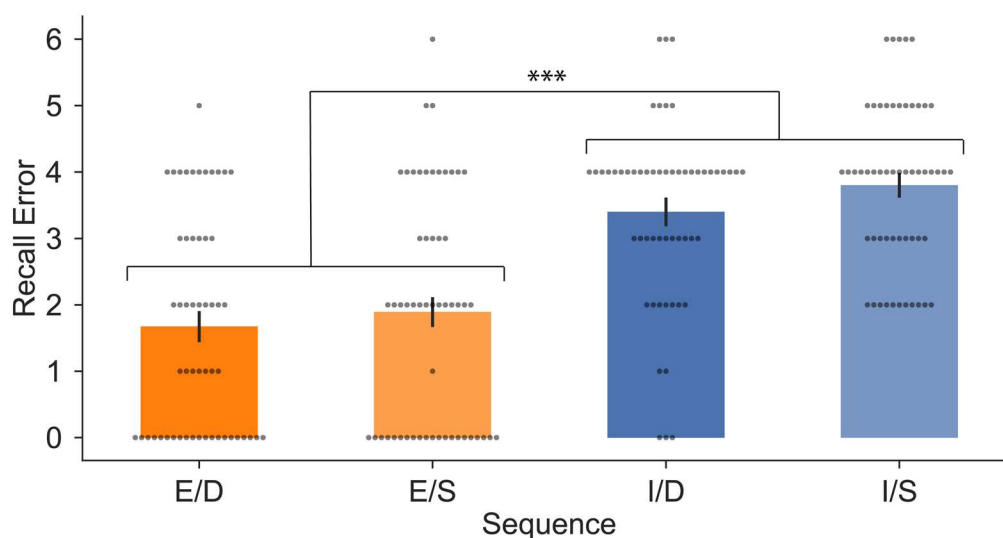

**Figure 4.** Explicit knowledge of sequences as assessed by free recall. Following the experiment, participants were prompted to type each sequence from memory given either the colored sequence cue (Explicit sequences) or the first item (Implicit sequences). Recall error is defined as the number of transpositions and/or substitutions needed to transform typed sequences into the actual sequences, with zero signifying perfect memory. As expected, explicit knowledge was greater for the explicitly trained sequence. Gray dots indicate individual subjects. Error bars indicate SEM<sup>norm</sup>. (E/D – Deeply trained, Explicit; I/D – Deeply trained, Implicit; E/S – Shallowly trained, Explicit, I/S – Shallowly trained, Implicit; \*\*\* =  $p < 0.001$ ).

#### 2.2.6. Degree of explicit knowledge related to overall performance in motivated context

To assess in more detail how varying amounts of explicit knowledge affects performance, we computed correlations between MT during Reward and participants' accuracy in free-recall. If sequence knowledge simply enhances motivational vigor, one might expect that knowledge should improve performance regardless of whether a pre-cue allows for advanced motor preparation. Explicit knowledge was significantly correlated with MT during Reward in both of the explicitly cued sequences (Deep/Explicit:  $r_s = 0.326$ ,  $p = 0.015$ , Shallow/Explicit:  $r_s = 0.590$ ,  $p < 0.001$ ; Figure 5a). These correlations were not significant in the implicitly trained sequences (Deep/Implicit:  $r_s = 0.212$ ,  $p = 0.119$ , Shallow/Implicit:  $r_s = 0.116$ ,  $p = 0.399$ ; Figure 5b). Explicit knowledge of the sequences was strongly related to performance in only the explicitly cued conditions, suggesting that gaining explicit knowledge of implicitly trained skills does not aid performance. In other words, explicit knowledge only seems to aid performance when participants receive a pre-cue that allows them to prepare their movements in advance.



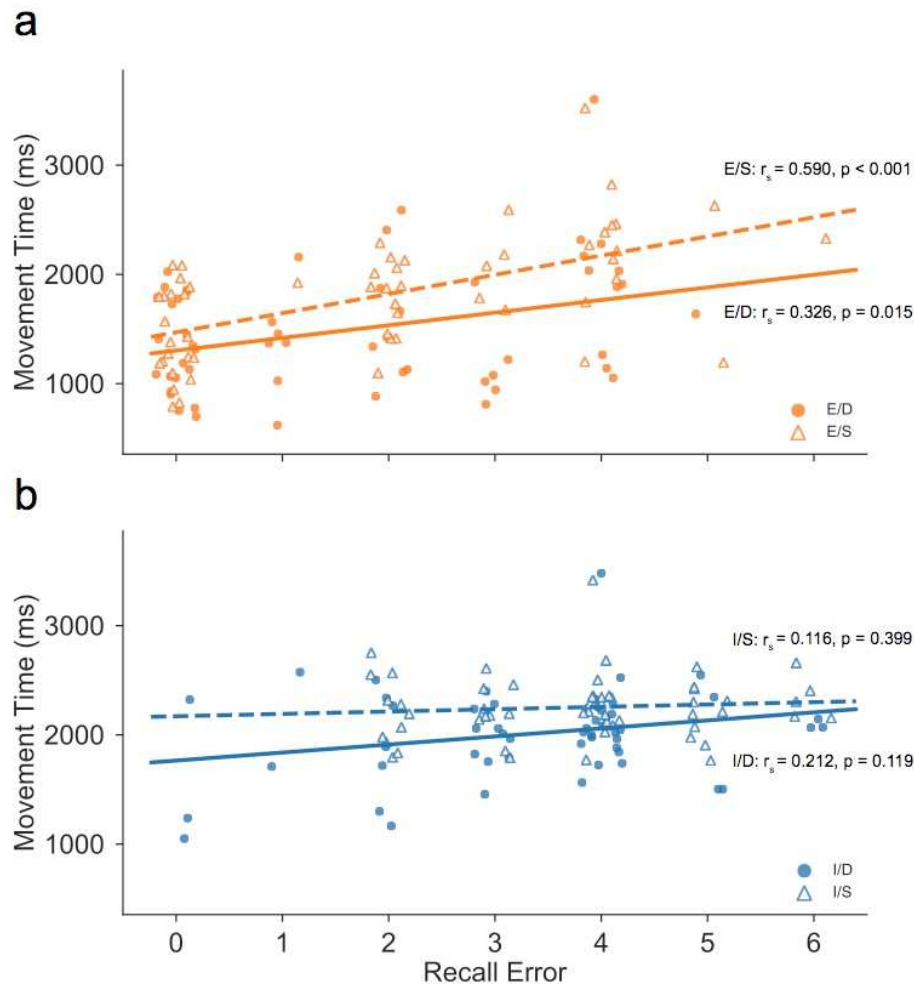

**Figure 5.** Relationship between explicit knowledge and movement time during the reward phase of the experiment. a) Greater explicit knowledge as assessed by the free recall tests at the end of the experiment was associated with faster movement times during performance with incentives for Explicit sequences. b) There was no significant association between explicit knowledge and performance for Implicit sequences.

### 2.2.7. Explicit knowledge is predictive of the degree of reward-induced performance enhancement

To further understand the relationship of explicit skill knowledge to the immediate reward-induced performance improvements, we looked at the correlations between explicit knowledge as measured by the free-recall tests and percentage improvement in MT (between T-Last10 and R-First10). We observed a significant correlation between explicit knowledge and MT improvement in both of the Explicit sequences (Deep/Explicit:  $r_s = 0.366$ ,  $p = 0.006$ , Shallow/Explicit:  $r_s = 0.359$ ,  $p = 0.007$ ; Figure 6a)



suggesting that greater sequence knowledge allowed for larger incentive-based skill enhancement. We did not observe a significant relationship between sequence knowledge and improvement in MT in either of the implicit sequences: Deep/Implicit ( $r_s = 0.160$ ,  $p = 0.243$ ), and Shallow/Implicit ( $r_s = 0.240$ ,  $p = 0.078$ ; Figure 6b). These results again suggest that performance-based incentives can enhance motor planning afforded by the sequence cues and explicit knowledge.

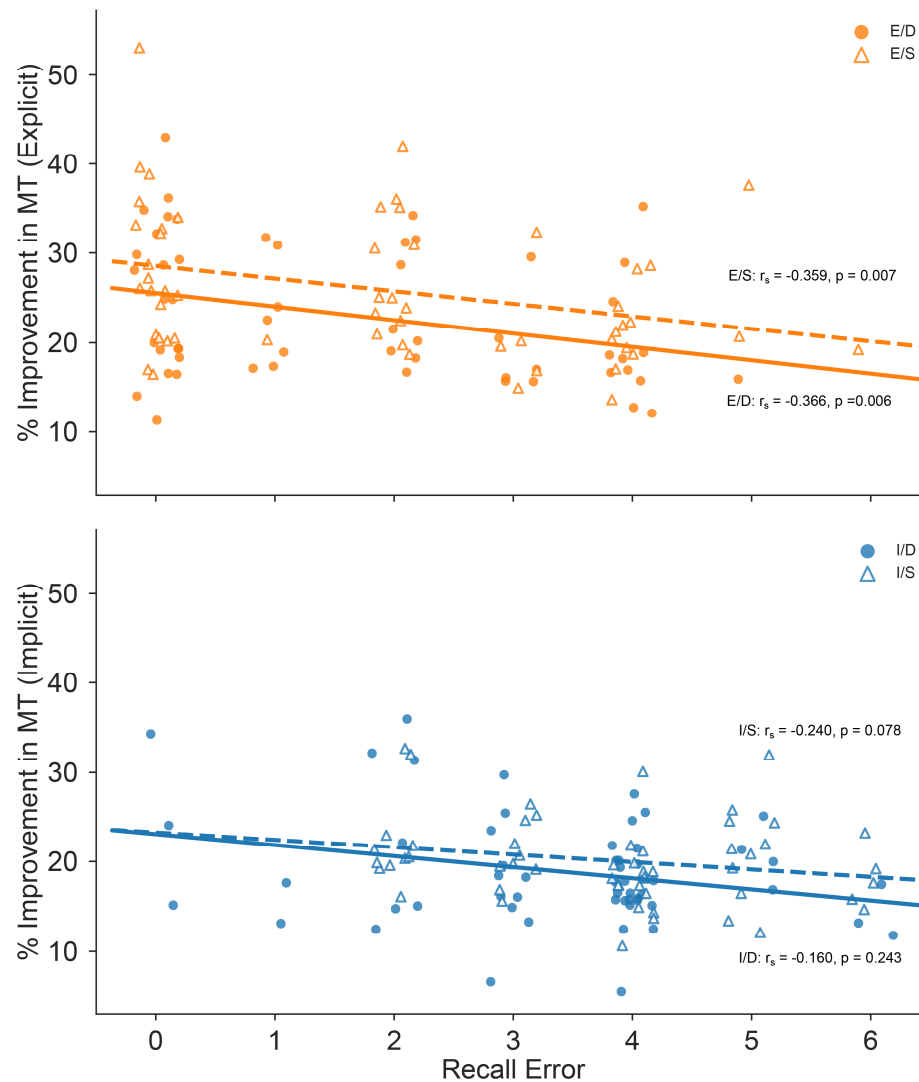

**Figure 6.** Relationship between explicit knowledge and immediate incentive-based performance improvements. Participants with greater explicit knowledge of the shallowly trained, explicit sequence showed the largest decreases in movement time following the introduction of performance-contingent incentives.

### 2.2.8. Recognition tests were not sensitive in assessing explicit knowledge

In addition to the free-recall tests, we assessed knowledge of the sequences after the experiment by assessing how well participants could distinguish between random sequences and the four trained sequences in a recognition test. Participants were able to identify all the trained sequences as “old” in this test (one sample t-tests: all  $p \leq 0.01$ ), but there was no main effect of cue nor training depth on recognition score (all  $p > 0.25$ ). Somewhat surprisingly, accuracy in the free-recall test and recognition test were not correlated (all  $p$ 's  $> 0.15$ ). Additionally, recognition scores were not correlated with MT performance in Reward (all  $p$ 's  $> 0.15$ ). The recognition tests did not appear to be as sensitive in assessing explicit knowledge as the free-recall tests.

## 3. EXPERIMENT 2

Many of the analyses in Experiment 1 were exploratory. In order to confirm the results from experiment 1, we ran a direct replication that was pre-registered using the Open Science Framework (OSF) (<https://osf.io/rs2ha/>).

### 3.1. Experiment 2 Materials and Methods

#### 3.1.1. Participants

35 right-handed subjects participated in Experiment 2 (19 females and 16 males, all right-hand dominant, mean age = 21.11, SD = 3.08 years). An additional 6 participants were consented, but then excluded because of ineligibility for the study or experimenter error. One participant was excluded from the recognition questionnaire analysis due to experimental error. All participants were paid \$10/hr + performance bonuses for their participation and provided written informed consent.

All methods and procedures were identical to those reported in Experiment 1.

### 3.2. Experiment 2 Results

#### 3.2.1. Explicit cues and increased practice led to better learning and performance in Training

The results from Experiment 2 confirmed the effectiveness of explicit cues in enhancing motor sequence learning relative to implicit learning (Figure 7). Explicit sequence cues again led to shorter MT (main effect of cue:  $F_{1,33} = 116.25$ ,  $p < 0.001$ ,  $\eta_p^2 = 0.779$ ), a faster learning rate (cue x block interaction:  $F_{4.26,140.55} = 5.65$ ,  $p < 0.001$ ,  $\eta_p^2 = 0.146$ ), and faster RT at the start of each sequence (main effect of cue:  $F_{1,33} = 23.65$ ,  $p < 0.001$ ,  $\eta_p^2 = 0.417$ ). While there was again no effect of Explicit cues on accuracy rate (main effect of cue:  $F_{1,34} = 0.696$ ,  $p = 0.410$ ,  $\eta_p^2 = 0.020$ ), we did find a main effect of block on accuracy rate ( $F_{7,238} = 2.80$ ,  $p = 0.008$ ,  $\eta_p^2 = 0.076$ ). This effect was driven by the fact

that participants were significantly more accurate during the first block of training when movement times were still relatively slow (block 1 vs block 2:  $t_{34} = 3.17$ ,  $p = 0.002$ ). Accuracy rate did not significantly differ between any subsequent consecutive blocks (range of  $t$ -values = 0.15-1.32, range of  $p$ -values = 0.19-0.88). Explicit cues improved both learning and performance during training.

We also validated the effect of practice (depth of training) on performance. MT and RT were both faster for the deeply trained sequences (main effect of depth:  $F_{1,33} = 31.50$ ,  $p < 0.001$ ,  $\eta_p^2 = 0.488$ ;  $F_{1,33} < 15.26$ ,  $p = 0.001$ ,  $\eta_p^2 = 0.316$ ), learning rate was greater (depth x block interaction:  $F_{2,87, 94.83} = 15.971$ ,  $p < 0.001$ ,  $\eta_p^2 = 0.326$ ), and accuracy rate was higher ( $F_{1,34} = 72.882$ ,  $p < 0.001$ ,  $\eta_p^2 = 0.682$ ). Additionally, we again observed a knowledge type by training depth interaction in MT whereby the benefit of training depth on MT was more pronounced for explicitly cued sequences than for implicitly trained sequences ( $F_{1,33} = 16.30$ ,  $p < 0.001$ ,  $\eta_p^2 = 0.331$ ). However, in Experiment 2 this interaction may have been driven by a speed-accuracy tradeoff: we also observed a knowledge type by training depth interaction in accuracy ( $F_{1,34} = 5.848$ ,  $p = 0.021$ ,  $\eta_p^2 = 0.147$ ). The benefit of practice depth on accuracy was greater for implicit sequences. It is possible that increased practice (deep training) contributed to skill by means of faster MT in explicit sequences, whereas in implicit sequences deep training contributed to skill with better accuracy. However, the results from Experiment 2 replicated the benefit of depth of training on learning and performance.

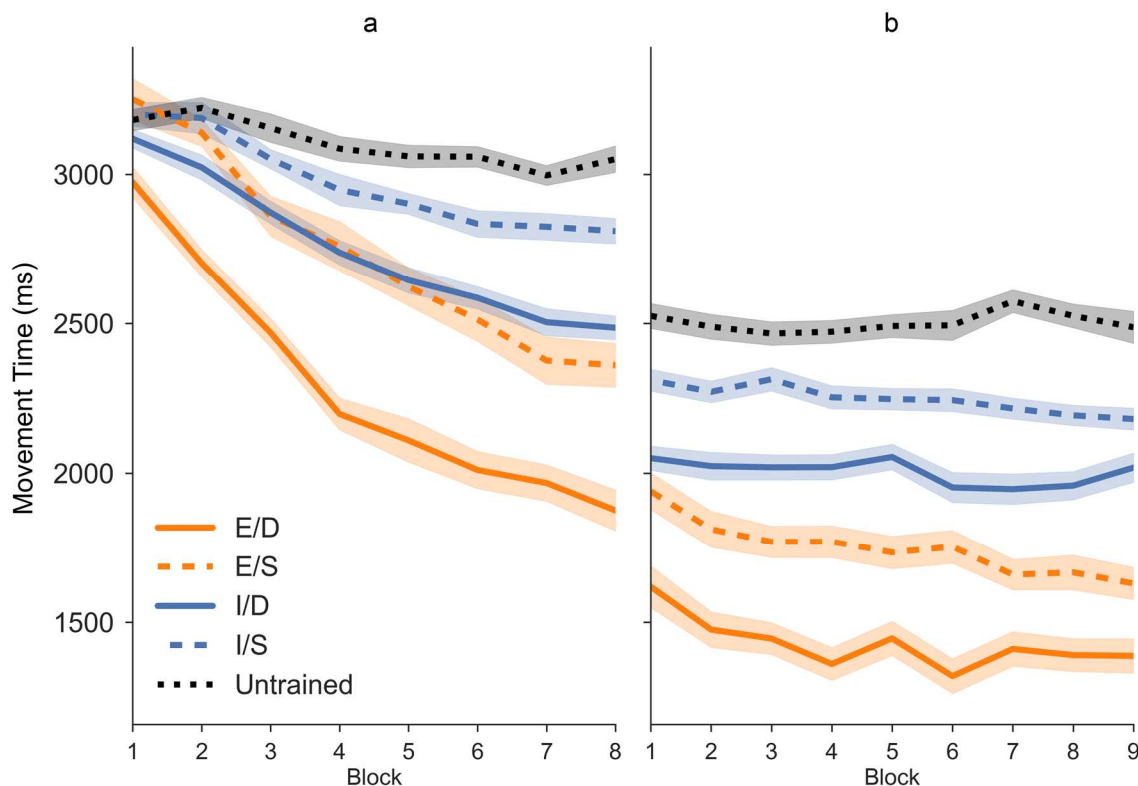

**Figure 7.** Mean movement time for correctly executed sequences in Experiment 2. Skill was measured as the total movement time between the first and last item in each sequence. a) Explicit sequence cues and increased training were both

associated with faster rates of learning. b) Following the introduction of performance-contingent monetary incentives, movement times immediately decreased for all sequences. Shaded areas indicate SEM<sup>norm</sup>. (E/D – Deeply trained, Explicit; I/D – Deeply trained, Implicit; E/S – Shallowly trained, Explicit; I/S – Shallowly trained, Implicit).

### 3.3.2. Immediate reward-related performance enhancement larger for explicitly trained skills

To confirm whether explicit knowledge moderates the effect of motivation on performance through improved motor planning, we again examined the immediate effect of introducing performance-contingent monetary incentives following training. Replicating the results from Experiment 1, participants immediately decreased their MT for all trained sequences and random sequences (see Figure 8;  $p < 0.001$  in one-sample t-tests for all sequences). We again observed a large decrease in MT on random sequences (18%), suggesting that monetary incentives had a global effect on motivational vigor independent from any sequence-specific skill knowledge. Replicating Experiment 1, the performance boost was virtually identical for random sequences and the two implicitly trained sequences (no main effect of sequence identity, explicit sequences excluded:  $F_{1,7,57.9} = 0.905$ ,  $p < 0.396$ ,  $\eta_p^2 = 0.026$ ), while MT improvement for explicitly cued sequences was significantly larger than that for implicitly trained sequences (main effect of cue type:  $F_{1,34} = 25.607$ ,  $p < 0.001$ ,  $\eta_p^2 = 0.43$ ). This again suggests that explicit knowledge and advanced planning in response to sequence cues allowed for skill enhancements above and beyond simple increases in overall motor vigor. In Experiment 2, we did not find a main effect of training depth ( $F_{1,34} = 0.097$ ,  $p = 0.757$ ,  $\eta_p^2 = 0.003$ ) nor a depth x cue type interaction ( $F_{1,34} = 0.038$ ,  $p = 0.847$ ,  $\eta_p^2 = 0.001$ ), pointing more strongly to the influence of explicit knowledge and not amount of training. As in Experiment 1, participants performed similarly during the last block of training on the I/D sequence and the E/S sequence ( $t_{34} = 1.47$ ,  $p = 0.15$ ), yet the immediate reward-based performance improvement was much larger for the explicitly trained sequence ( $t_{34} = 3.22$ ,  $p < 0.005$ ). These confirmatory results suggest that incentives improve overall movement speed, but have an additional effect in enhancing motor planning enabled by the presence of explicit knowledge.

As in Experiment 1, these effects also cannot be explained by the fact that participants are relatively faster at the end of training for the explicitly cued sequences. We did not find a statistically significant relationship between skill level, as indexed by MT, at the end of training and the size of the reward-related performance enhancement for any of the sequences (E/D:  $r_s = -0.12$ ,  $p = 0.5$ ; E/S:  $r_s = 0.08$ ,  $p = 0.64$ ; I/D:  $r_s = 0.02$ ,  $p = 0.90$ ; I/S:  $r_s = -0.19$ ,  $p = 0.28$ ; Untrained:  $r_s = -0.31$ ,  $p = 0.08$ ).

The introduction of monetary incentives again led to faster RT to the first item of each sequence ( $p < 0.001$  in one-sample t-tests for all sequences). We again found no

significant effects of cue type or training depth on this RT improvement suggesting that this effect was similar across all trial types (main effect of cue type:  $F_{1,34} = 1.50$ ,  $p = 0.229$ ,  $\eta_p^2 = 0.042$ ; main effect of training depth:  $F_{1,34} = 0.86$ ,  $p = 0.361$ ,  $\eta_p^2 = 0.025$ ; depth x cue interaction:  $F_{1,34} = 0.19$ ,  $p = 0.67$ ,  $\eta_p^2 = 0.005$ ). This again suggests that performance improvement for explicit sequences is in part due to enhancements in planning movements beyond the first item in the sequence.

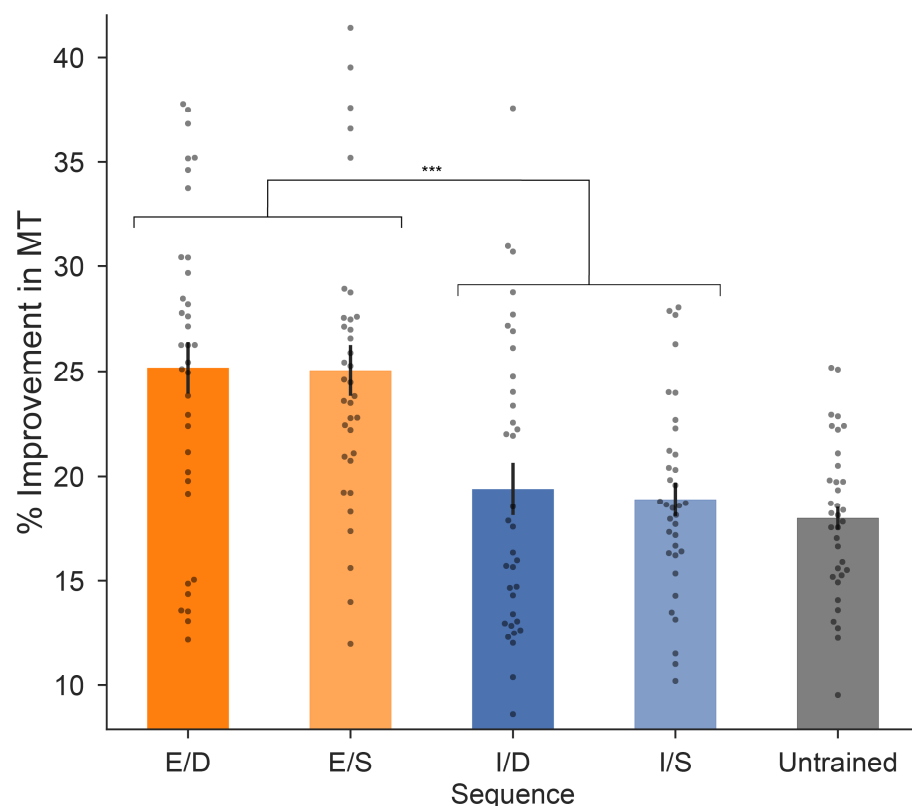

**Figure 8.** Replication of incentive-based performance improvements. In Experiment 2, performance-contingent monetary incentives led to larger gains in performance on explicitly trained sequences relative to implicit and untrained sequences. Error bars indicate  $SEM^{norm}$ . (D/E – Deeply trained, Explicit; I/D – Deeply trained, Implicit, S/E – Shallowly trained, Explicit, I/S – Shallowly trained, Implicit).

### 3.3.3. Better performance in explicitly cued sequences and deeply trained sequences was robust in motivated context

To confirm the performance benefits of explicit knowledge and increased practice persisted in contexts with increased motivation, we again looked at overall performance in the Reward phase. Explicit cues led to faster MT in Reward ( $F_{1,34} = 59.413$ ,  $p <$

0.001,  $\eta_p^2 = 0.636$ ). A similar main effect of explicit cues was observed in RT ( $F_{1,34} = 70.801$ ,  $p < 0.001$ ,  $\eta_p^2 = 0.676$ ). MTs were faster in more heavily practiced sequences during Reward (main effect of training depth:  $F_{1,34} = 85.915$ ,  $p < 0.001$ ,  $\eta_p^2 = 0.716$ ). The same effect was observed in RT ( $F_{1,34} = 5.932$ ,  $p = 0.020$ ,  $\eta_p^2 = 0.149$ ). Replicating Experiment 1, the overall benefits of explicit cues and depth of training observed during Training remained with the addition of monetary incentives.

### *Accuracy increased with higher incentive values*

We next assessed whether performance accuracy in Experiment 2 was sensitive to incentive magnitude in the Reward phase. Participants were somewhat sensitive to incentive magnitude; in contrast to the results seen in Experiment 1, they were more accurate as reward value grew large (main effect of incentive magnitude:  $F_{2,68} = 3.19$ ,  $p = 0.047$ ,  $\eta_p^2 = 0.086$ ). Unlike Experiment 1, we did not observe a reward by training depth interaction ( $F_{2,68} = 0.234$ ,  $p = 0.792$ ,  $\eta_p^2 = 0.007$ ). Given the effect of incentive magnitude on performance was inconsistent and relatively weak across the two experiments, we will refrain from discussing them further.

Perhaps due to the use of strict time limits, shallowly trained sequences were again more accurate during the Reward phase (main effect of training depth:  $F_{1,34} = 10.46$ ,  $p < 0.005$ ,  $\eta_p^2 = 0.235$ ) as were implicit sequences (main effect of cue type:  $F_{1,34} = 7.90$ ,  $p < 0.01$ ,  $\eta_p^2 = 0.189$ ). Additionally, there were no significant interactions between reward, training depth, or cue type (all  $p > 0.15$ ). Neither explicit sequence knowledge nor the depth of training affected the impact of incentive magnitude on performance.

### *3.3.4. Explicit knowledge greater for explicitly cued sequences*

As expected, participants were able to recall explicitly cued sequences more accurately than implicitly trained ones ( $F_{1,34} = 49.790$ ,  $p < 0.001$ ,  $\eta_p^2 = 0.594$ ). Unlike Experiment 1, there was no effect of training depth on explicit knowledge ( $F_{1,34} = 0.004$ ,  $p = 0.949$ ,  $\eta_p^2 = 0.000$ ), indicating that increased practice and exposure did not result in greater explicit sequence knowledge. Experiment 2 confirms that the explicit cueing manipulation successfully resulted in increased knowledge of explicit sequences, independent of the amount of practice.

### *3.3.5. Degree of explicit knowledge related to performance in motivated context*

To assess in more detail how varying amounts of explicit knowledge affects performance, we again computed correlations between MT during Reward and participants' accuracy in free-recall. Congruent with Experiment 1, explicit knowledge was significantly correlated with mean MT during Reward in both of the explicitly cued sequences (E/D:  $r_s = 0.586$ ,  $p < 0.001$ , E/S:  $r_s = 0.619$ ,  $p < 0.001$ ). Furthermore, this correlation was not significant in the implicitly trained sequences (I/D:  $r_s = 0.239$ ,  $p = 0.166$ , I/S:  $r_s = -0.024$ ,  $p = 0.891$ ). Explicit knowledge of the sequences was again strongly related to performance in only the explicitly cued conditions; explicit knowledge is helpful when it can be used to aid in motor planning.



### 3.3.6. *Explicit knowledge is predictive of the degree of reward-induced performance enhancement*

To confirm explicit skill knowledge is related to immediate reward-induced performance improvements, we again examined the relationship between explicit knowledge and the immediate performance gains seen in response to the introduction of monetary incentives. We again observed a significant correlation between explicit knowledge and MT improvement in the Shallow/Explicit sequence ( $r_s = -0.47$ ,  $p = 0.004$ ) suggesting that greater sequence knowledge allowed for larger incentive-based skill enhancement. Again, this relationship did not hold for either of the implicit sequences: Deep/Implicit ( $r_s = -0.087$ ,  $p = 0.62$ ), and Shallow/Implicit ( $r_s = 0.055$ ,  $p = 0.75$ ). Interestingly, we did not find a significant relationship between sequence knowledge and the level of MT improvement for the Deep/Explicit sequence ( $r_s = -0.028$ ,  $p = 0.87$ ), however variability across participants was low as many participants' (18 total) had perfect knowledge of this sequence (i.e. edit-distance of 0). If these participants with perfect knowledge are excluded from the analysis, we again observe a significant relationship between the level of explicit knowledge and the size of incentive-based performance improvement in MT ( $r_s = -0.55$ ,  $p = 0.02$ ). These results again suggest that performance-based incentives can enhance motor planning afforded by the sequence cues and explicit knowledge.

### 3.3.7. *Recognition tests are weak predictors of performance*

Just as in Experiment 1, participants were able to identify all the trained sequences as "old" in this test (one sample t-tests: all  $p \leq 0.01$ ), and there was no main effect of cue nor training depth on recognition score (all  $p > 0.5$ ). Accuracy in the free-recall test and recognition test was correlated in the Shallow/Explicit sequence ( $r_s = -0.50$ ,  $p = 0.0029$ ), but not in any other sequence (all  $p > 0.5$ ). Across the two experiments, there does not seem to be much evidence that the ability to recognize learned sequences is related to strong explicit knowledge of the sequences.

Unlike in Experiment 1, MT and recognition score were correlated in two of the sequences: Shallow/Explicit ( $r_s = -0.4$ ,  $p = 0.018$ ) and Deep/Implicit ( $r_s = -0.41$ ,  $p = 0.017$ ). Correlation between Reward MT and recognition score was not significant in Deep/Explicit ( $r_s = -0.084$ ,  $p = 0.64$ ) nor in Shallow/Implicit ( $r_s = -0.3$ ,  $p = 0.084$ ). Given the variability in the relationship between motivated performance and explicit knowledge as assessed by the recognition tests across the two experiments, we refrain from making definitive claims regarding these results.

## 4. Discussion

We sought to investigate whether monetary incentives serve to enhance skilled motor performance by simply increasing the motivational vigor of movements, improving movement planning/preparation, or both. In our task, participants learned to perform



four separate sequences, two of which were explicitly cued to allow for the pre-planning of movements. Explicit cues led to a faster rate of skill acquisition and greater levels of skill knowledge as assessed at the end of the experiment. Immediately after the introduction of performance-contingent monetary incentives, we observed a global boost in performance in the execution of all trained sequences and untrained (random) sequences. However, magnitude of incentive-based performance enhancement was much larger for the explicitly cued sequences, which allow for the pre-planning of movements. Furthermore, the size of this performance boost was proportional to the level of explicit knowledge attained by our participants. These effects were all replicated in a separate, pre-registered experiment. These results provide evidence that performance-contingent monetary incentives lead to improvements in both motor execution and motor planning in motor sequencing skills.

#### *4.1. Reward leads to improvements in execution vigor and/or action selection*

There are numerous studies that show that training improves the execution of trained motor sequences (see Krakauer, Hadjiosif, Xu, Wong, & Haith, 2019 for a comprehensive review). However, sequence learning tasks, such as the DSP task used here, have also been shown to improve the execution of novel sequences or randomly generated sequences (e.g. Nissen & Bullemer, 1987). This sequence-independent improvement likely relies on improvements in motor execution and simple action selection. That is, participants simply move more quickly and improve their ability in mapping visual stimuli to the correct motor response (i.e. finger press). The introduction of performance-contingent monetary incentives clearly led to enhancements in motivational vigor that improved one or both of these processes. Participants in both Experiment 1 and Experiment 2 were immediately able to speed up their responses to random sequences by almost 20%. Given that performance on the implicitly trained sequences improved to a similar extent, it is likely that improvements on these sequences were likewise driven by enhancements in either simple execution, action selection, or both.

This finding of incentive-induced improvements in the execution of trained and novel sequences adds to the significant literature which demonstrates that the availability of reward results in faster, more accurate movements (Manohar et al., 2015; Manohar, Finzi, Drew, & Husain, 2017; Summerside et al., 2018). Prior work has shown that rewards can speed up both simple reaction time and action selection with a simple stimulus-response mapping (Mir et al., 2011; Ramnani & Miall, 2003). We cannot disentangle which of these two processes is more affected by motivation in our paradigm. Although several studies have shown that the introduction of performance-contingent rewards also benefits the execution of motor skills (Mosberger et al., 2016; Wachter et al., 2009), the current results suggest that for implicitly trained skills that do not allow for the pre-planning of movement this improvement is simply the result of a global increase in movement speed and not skill-specific.

#### *4.2. Improvements in pre-planning*

The positive effect of prospective rewards on motor execution and action selection almost certainly contributed to the enhanced performance seen for explicitly cued sequences as well. However, the size of the immediate reward-related performance enhancement was larger for explicitly cued sequences than implicit and random sequences. This suggests that the availability of reward and increased motivation also conferred a benefit to the movement pre-planning afforded by the combination of explicit knowledge and the sequence cues. Many studies point to the importance of cognitive control processes in explicit sequence learning (Ashe, Lungu, Basford, & Lu, 2006; Bo & Seidler, 2009; Seidler, Bo, & Anguera, 2012; Unsworth & Engle, 2005). Specifically, larger working memory capacity and proactive control strategies are known to be predictive of the level of skill improvement during training. It is thought that the role of these processes in sequence learning is to aid in pre-planning movements and to aid in the formation of motor chunks. In cognitive tasks, the prospect of reward has been recently shown to lead to enhancements in these same cognitive control processes (Botvinick & Braver, 2014; Jimura et al., 2010; Krawczyk, Gazzaley, & D'Esposito, 2007; Padmala & Pessoa, 2011). It stands to reason that explicit sequence performance in our task benefitted both from reward-related enhancement in cognitive control processes as well as simple increases in motivational vigor. Although several studies have shown that movement planning in the context of a single button press can be enhanced by the availability of reward (Mir et al., 2011; Ramnani & Miall, 2003), here we show this same enhancement can also improve the execution of a more complex skill.

The level of explicit knowledge our participants had about a particular explicitly cued sequence was correlated with the magnitude of reward-related enhancement in performance. Similarly, average movement time throughout the reward phase of the experiment was also correlated with explicit knowledge. Although some participants clearly gained at least some explicit knowledge of the implicitly trained sequences, we did not observe these same knowledge-performance links. The benefit of explicit knowledge could only be fully realized when sequence cues were available. While recent work suggests that improvements in performance on implicit sequencing skills can be attributed to improvements in movement planning (Ariani & Diedrichsen, 2019), it does not seem that reward amplified online movement planning for implicit skills in our study given we observed similar improvement for untrained sequences that could not be planned. This again suggests that the benefit of skill knowledge on performance is amplified by reward, but only when the pre-planning of movements is possible. In the context of simple movements, there is some prior work that also suggests that the speed of motor execution is enhanced by reward specifically when the movement can be planned in advance (Mir et al., 2011; Ramnani & Miall, 2003). Although we show here that even unplanned movements (implicit and untrained sequences) can be executed more quickly when rewards are available, there is clearly an added benefit to movement planning.

#### *4.3. Knowledge: increased motivation or planning?*

Some researchers have suggested that the benefit produced by explicit knowledge in motor sequencing tasks is not related to motor planning, but rather that knowledge acts to globally increase motivational vigor (Wong, Lindquist, Haith, & Krakauer, 2015). In other words, knowledge functionally acts as a reward cue, leading to faster and more accurate movements. This hypothesis can indeed explain why participants in our experiments are faster in performing explicitly cued sequences relative to implicit sequences at the end of training. Along this line of thinking, implicit sequences are performed more slowly simply because participants lack motivation. The pre-cue and explicit knowledge of the to-be-performed sequence increases motivational vigor and results in faster execution of each individual key-press. However, we do not believe that this account provides a parsimonious explanation of the results seen here. We would expect that the introduction of performance-contingent rewards would have a similar or *larger* immediate effect on the performance of implicitly trained sequences when compared to explicit sequences. That is, if the reason that implicitly trained sequences were performed more slowly toward the end of training was because of a relative lack of motivation, one might expect that an immediate increase in motivation due to the prospect of reward would preferentially advantage implicit skills. We instead observed that explicitly trained sequences received the greatest benefit from the introduction of performance-contingent monetary incentives.

If explicit knowledge does not enable movement pre-planning and instead simply enhances motivational vigor, our results would suggest that the addition of extrinsic rewards produces a multiplicative effect on the enhanced intrinsic motivation induced by explicit knowledge. We find this account implausible for several reasons. First, the dominant account of the interaction between intrinsic and extrinsic motivation suggests that extrinsic rewards actually reduce intrinsic motivation rather than amplifying it (Deci, Richard, & Ryan, 1999). Although there is some work that suggests that intrinsic and extrinsic motivation may be additive (Hendijani, Bischak, Arvai, & Dugar, 2016), this work suggests that the two don't interact and are sub-additive. Second, we would also expect that the level of explicit knowledge for implicit sequences would similarly be associated with the magnitude of reward-related enhancement. We did not find any evidence for such a relationship. Instead, knowledge was only predictive of this immediate reward-related enhancement when participants received a sequence cue that allowed them to plan movements in advance of execution. However, we cannot rule out completely that receiving the sequence cue in advance of performing the explicitly trained skills served to enhance motivation and that this effect was specifically magnified by the introduction of monetary incentives.

#### *4.4. Immediate incentive-dependent enhancement is unlikely to be due to rapid consolidation*

For all participants in our studies, there was a short break (<5 min) between the end of training and the introduction of monetary incentives while they were given instructions regarding the reward phase of the experiment. One recent study has suggested that it is

possible performance improvements on sequence learning tasks can occur offline during short breaks via rapid forms of consolidation (Bönstrup et al., 2019). It is possible that the differences in incentive-based performance improvements that we see between implicitly and explicitly trained sequences are due to differences in rapid consolidation rather than the introduction of incentives. While we cannot completely rule out this possibility, we believe this is unlikely for several reasons. First, in the study reporting rapid consolidation, offline performance improvements occurred primarily at the start of training (first ~10 trials) and diminished in size as training progressed. Monetary incentives were introduced much later in our experiment after many trials of training when the size of any offline consolidation benefits should be negligible. Second, while we observe larger improvements for explicitly trained sequences, most studies of skill consolidation have observed smaller offline consolidation benefits for explicit sequences relative to implicit sequences (Robertson, Pascual-Leone, & Press, 2004). Finally, the degree of immediate performance improvement we see after the introduction of incentives (>20%) is much larger than the consolidation benefits reported in prior work on offline consolidation over periods of wakefulness (e.g. Bönstrup et al., 2019; Brown & Robertson, 2007), suggesting a separate mechanism.

#### *4.5. Inconsistent effects of reward magnitude on performance*

Although we provide some evidence that participants in our study are somewhat sensitive to the incentive magnitude during the reward phase of the experiment, these effects were inconsistent across the two experiments. In Experiment 1, we observed that performance on shallowly trained sequences followed an inverted-U shape reminiscent of the effects of choking under pressure we have reported previously (Lee et al., 2019; Lee & Grafton, 2015). In Experiment 2 however, we were unable to replicate this finding. Instead, we simply found that accuracy on all sequences improved as the incentive magnitudes became large. There are many individual differences that affect how people respond to monetary incentives, which may have led to the heterogeneity in responses seen here (Chib, De Martino, Shimojo, & O'Doherty, 2012; Lee & Grafton, 2015; Masters, Polman, & Hammond, 1993). Given the inconsistency in results across the two experiments, it is difficult to draw firm conclusions on how incentive magnitude affects performance on this task.

#### *4.6. Conclusion*

Across two experiments employing a sequence learning task paired with performance-contingent incentives, this study showed motivation improves two separate aspects of skilled motor performance. As reported in previous work, incentives invigorate movement execution leading to some performance improvements independent of both skill knowledge and the level of skill obtained. However, increased motivation also serves to enhance the contribution of explicit knowledge to the performance of motor sequencing skills, likely via improved motor planning. This finding helps clarify the mechanism by which enhanced motivation improves skilled performance and also highlights the contribution of explicit training and skill knowledge in sequence learning.

## References

- Anguera, J. A., Reuter-Lorenz, P. A., Willingham, D. T., & Seidler, R. D. (2010). Contributions of spatial working memory to visuomotor learning. *Journal of Cognitive Neuroscience*, 22(9), 1917–1930. <https://doi.org/10.1162/jocn.2009.21351>
- Ariani, G., & Diedrichsen, J. (2019). Sequence learning is driven by improvements in motor planning. *Journal of Neurophysiology*, 121(6), 2088–2100. <https://doi.org/10.1152/jn.00041.2019>
- Ashe, J., Lungu, O. V, Basford, A. T., & Lu, X. (2006). Cortical control of motor sequences. *Current Opinion in Neurobiology*, 16(2), 213–221. <https://doi.org/10.1016/j.conb.2006.03.008>
- Bo, J., & Seidler, R. D. (2009). Visuospatial working memory capacity predicts the organization of acquired explicit motor sequences. *Journal of Neurophysiology*, 101(6), 3116–3125. <https://doi.org/10.1152/jn.00006.2009>
- Bönstrup, M., Iturrate, I., Thompson, R., Cruciani, G., Censor, N., & Cohen, L. G. (2019). A Rapid Form of Offline Consolidation in Skill Learning. *Current Biology*, 29(8), 1346–1351.e4. <https://doi.org/10.1016/j.cub.2019.02.049>
- Botvinick, M. M., & Braver, T. S. (2014). Motivation and cognitive control: From behavior to neural mechanism. *Annual Review of Psychology*, 66, 82–113. <https://doi.org/10.1146/annurev-psych-010814-015044>
- Brown, R. M., & Robertson, E. M. (2007). Off-Line Processing: Reciprocal Interactions between Declarative and Procedural Memories. *Journal of Neuroscience*, 27(39), 10468–10475. <https://doi.org/10.1523/JNEUROSCI.2799-07.2007>
- Buračas, G. T., & Boynton, G. M. (2002). Efficient Design of Event-Related fMRI Experiments Using M-Sequences. *NeuroImage*, 16(3), 801–813. <https://doi.org/10.1006/nimg.2002.1116>
- Chib, V. S., De Martino, B., Shimojo, S., & O’Doherty, J. P. (2012). Neural mechanisms underlying paradoxical performance for monetary incentives are driven by loss aversion. *Neuron*, 74(3), 582–594. <https://doi.org/10.1016/j.neuron.2012.02.038>
- Damerau, F. J. (1964). A technique for computer detection and correction of spelling errors. *Communications of the ACM*, 7(3), 171–176.
- Deci, E., Richard, K., & Ryan, R. M. (1999). A Meta-Analytic Review of Experiments Examining the Effects of Extrinsic Rewards on Intrinsic Motivation. *Psychological Bulletin*, 125(6), 627–668.
- Diedrichsen, J., & Kornysheva, K. (2015). Motor skill learning between selection and execution. *Trends in Cognitive Sciences*, 19(4), 227–233. <https://doi.org/10.1016/j.tics.2015.02.003>



- Etzel, J. a, Cole, M. W., Zacks, J. M., Kay, K. N., & Braver, T. S. (2015). Reward Motivation Enhances Task Coding in Frontoparietal Cortex. *Cerebral Cortex (New York, N.Y. : 1991)*, (Pessoa 2009), 1–13. <https://doi.org/10.1093/cercor/bhu327>
- Grafton, S. T., Hazeltine, E., & Ivry, R. (1995). Functional mapping of sequence learning in normal humans. *Journal of Cognitive Neuroscience*, 7(4), 497–510. <https://doi.org/10.1162/jocn.1995.7.4.497>
- Hendijani, R., Bischak, D. P., Arvai, J., & Dugar, S. (2016). Intrinsic motivation, external reward, and their effect on overall motivation and performance. *Human Performance*, 29(4), 251–274. <https://doi.org/10.1080/08959285.2016.1157595>
- Hikosaka, O., Nakamura, K., Sakai, K., & Nakahara, H. (2002). Central mechanisms of motor skill learning. *Current Opinion in Neurobiology*, 12(2), 217–222. [https://doi.org/10.1016/S0959-4388\(02\)00307-0](https://doi.org/10.1016/S0959-4388(02)00307-0)
- Jimura, K., Locke, H. S., & Braver, T. S. (2010). Prefrontal cortex mediation of cognitive enhancement in rewarding motivational contexts. *Proceedings of the National Academy of Sciences of the United States of America*, 107(19), 8871–8876. <https://doi.org/10.1073/pnas.1002007107>
- Krakauer, J. W., Hadjiosif, A. M., Xu, J., Wong, A. L., & Haith, A. M. (2019). Motor Learning. *Comprehensive Physiology*, 9(April), 613–663. <https://doi.org/10.1002/cphy.c170043>
- Krawczyk, D. C., Gazzaley, A., & D’Esposito, M. (2007). Reward modulation of prefrontal and visual association cortex during an incentive working memory task. *Brain Research*, 1141(1), 168–177. <https://doi.org/10.1016/j.brainres.2007.01.052>
- Lee, T. G., Acuña, D. E., Kording, K. P., & Grafton, S. T. (2019). Limiting motor skill knowledge via incidental training protects against choking under pressure. *Psychonomic Bulletin and Review*, 26(1), 279–290. <https://doi.org/10.3758/s13423-018-1486-x>
- Lee, T. G., & Grafton, S. T. (2015). Out of control: Diminished prefrontal activity coincides with impaired motor performance due to choking under pressure. *NeuroImage*, 105, 145–155. <https://doi.org/10.1016/j.neuroimage.2014.10.058>
- Levenshtein, V. I. (1966). Binary codes capable of correcting deletions, insertions, and reversals. *Soviet Physics Doklady*, 10(8), 707–710.
- Manohar, S. G., Chong, T. T., Apps, M. A. J., Batla, A., Stamelou, M., Jarman, P. R., ... Husain, M. (2015). Reward Pays the Cost of Noise Reduction in Motor and Cognitive Control. *Current Biology*, 25, 1707–1716. <https://doi.org/10.1016/j.cub.2015.05.038>
- Manohar, S. G., Finzi, R. D., Drew, D., & Husain, M. (2017). Distinct Motivational Effects of Contingent and Noncontingent Rewards. *Psychological Science*, 095679761769332. <https://doi.org/10.1177/0956797617693326>
- Masters, R. S. W., Polman, R. C. J., & Hammond, N. V. (1993). “Reinvestment”: A dimension of personality implicated in skill breakdown under pressure. *Personality*

- and Individual Differences*, 14(5), 655–666. [https://doi.org/10.1016/0191-8869\(93\)90113-H](https://doi.org/10.1016/0191-8869(93)90113-H)
- Mir, P., Trender-Gerhard, I., Edwards, M. J., Schneider, S. A., Bhatia, K. P., & Jahanshahi, M. (2011). Motivation and movement : the effect of monetary incentive on performance speed. *Experimental Brain Research*, 209, 551–559. <https://doi.org/10.1007/s00221-011-2583-5>
- Mosberger, A. C., De Clauser, L., Kasper, H., & Schwab, M. E. (2016). Motivational state, reward value, and Pavlovian cues differentially affect skilled forelimb grasping in rats. *Learning and Memory*, 23(6), 289–302. <https://doi.org/10.1101/lm.039537.115>
- Nissen, M. J., & Bullemer, P. (1987). Attentional Requirements of Learning : Performance Measures Evidence from Performance Measures. *Cognitive Psychology*, 19(1), 1–32.
- Padmala, S., & Pessoa, L. (2011). Reward reduces conflict by enhancing attentional control and biasing visual cortical processing. *Journal of Cognitive Neuroscience*, 23(11), 3419–3432. [https://doi.org/10.1162/jocn\\_a\\_00011](https://doi.org/10.1162/jocn_a_00011)
- Ramnani, N., & Miall, R. C. (2003). Instructed delay activity in the human prefrontal cortex is modulated by monetary reward expectation. *Cerebral Cortex*, 13(3), 318–327. <https://doi.org/10.1093/cercor/13.3.318>
- Reber, P. J., & Squire, L. R. (1994). Parallel brain systems for learning with and without awareness. *Learning & Memory*, 1, 217–229. <https://doi.org/10.1101/lm.1.4.217>
- Robertson, E. M., Pascual-Leone, A., & Press, D. Z. (2004). Awareness modifies the skill-learning benefits of sleep. *Current Biology*, 14, 208–212. <https://doi.org/10.1016/j.cub.2004.01.027>
- Schendan, H. E., Searl, M. M., Melrose, R. J., & Stern, C. E. (2003). An FMRI study of the role of the medial temporal lobe in implicit and explicit sequence learning. *Neuron*, 37(6), 1013–1025. Retrieved from <http://www.ncbi.nlm.nih.gov/pubmed/12670429>
- Seidler, R. D., Bo, J., & Anguera, J. A. (2012). Neurocognitive contributions to motor skill learning: The role of working memory. *Journal of Motor Behavior*, 44(6), 445–453. <https://doi.org/10.1080/00222895.2012.672348>
- Summerside, E. M., Shadmehr, R., & Ahmed, A. A. (2018). Vigor of reaching movements: reward discounts the cost of effort. *Journal of Neurophysiology*, 119, 2347–2357. <https://doi.org/10.1152/jn.00872.2017>
- Takikawa, Y., Kawagoe, R., Itoh, H., Nakahara, H., & Hikosaka, O. (2002). Modulation of saccadic eye movements by predicted reward outcome. *Experimental Brain Research*, 142(2), 284–291. <https://doi.org/10.1007/s00221-001-0928-1>
- Unsworth, N., & Engle, R. W. (2005). Individual differences in working memory capacity and learning: evidence from the serial reaction time task. *Memory & Cognition*, 33(2), 213–220. Retrieved from <http://www.ncbi.nlm.nih.gov/pubmed/16028576>



- Verwey, W. B., Lammens, R., & van Honk, J. (2002). On the role of the SMA in the discrete sequence production task: a TMS study. *Transcranial Magnetic Stimulation. Neuropsychologia*, 40(8), 1268–12676.
- Wachter, T., Lungu, O. V., Liu, T., Willingham, D. T., & Ashe, J. (2009). Differential Effect of Reward and Punishment on Procedural Learning. *Journal of Neuroscience*, 29(2), 436–443. <https://doi.org/10.1523/jneurosci.4132-08.2009>
- Willingham, D. B., & Goedert-Eschmann, K. (1999). The Relation Between Implicit and Explicit Learning: Evidence for Parallel Development. *Psychological Science*, 10(6), 531–534. <https://doi.org/10.1111/1467-9280.00201>
- Willingham, Daniel B, Salidis, J., & Gabrieli, J. D. E. (2002). Direct comparison of neural systems mediating conscious and unconscious skill learning. *Journal of Neurophysiology*, 88(3), 1451–1460. Retrieved from <http://www.ncbi.nlm.nih.gov/pubmed/12205165>
- Wong, A. L., Lindquist, M. A., Haith, A. M., & Krakauer, J. W. (2015). Explicit knowledge enhances motor vigor and performance: motivation versus practice in sequence tasks. *Journal of Neurophysiology*, 114(1), 219–232. <https://doi.org/10.1152/jn.00218.2015>
